# Supplementary material for: Clinical features of DDX41 mutation-related diseases: a systematic review with individual patient data
Source: PubMed Central journal article supplement — Ther Adv Hematol. 2021 Jul 16;12:20406207211032433. doi: 10.1177/20406207211032433 (PMC8287267; doi:10.1177/20406207211032433), 2021-07-16
Supplement: sj-pdf-1-tah-10.1177_20406207211032433.pdf [file sj-pdf-1-tah-10.1177_20406207211032433.pdf]

# **Clinical features of *DDX41* mutation-related diseases: a systematic review with individual patient data**

Ziqi Wan<sup>1</sup>, Bing Han<sup>1\*</sup>

<sup>1</sup>Department of Hematology, Peking Union Medical College Hospital, Chinese Academy of Medical Science, China

Supplementary contents

Supplementary figure 1 Forest plot of *DDX41* incidence (see below)

For supplementary tables, please check extra excel files (.xlsx).

Supplementary table 1 Reasons to include all the 30 articles

Supplementary table 2 Individual patient-level dataset

Supplementary table 3 Quality evaluation of 20 articles in the quantitative analysis

Supplementary table 4 Comparisons of AML, MDS and other diagnoses

Supplementary table 5 Comparisons of familial and sporadic cases

Supplementary table 6 Comparisons of carrying p.R525H and other somatic variants

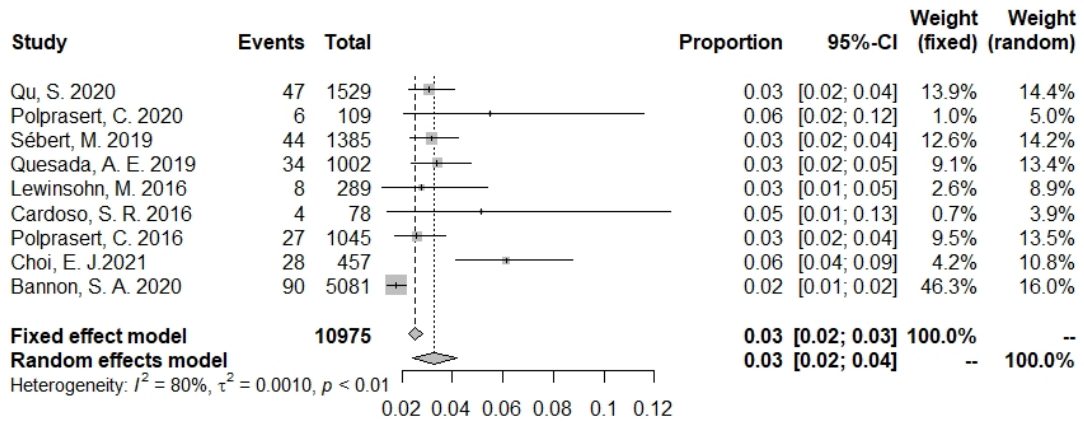

Supplementary figure 1 Forest plot of *DDX41* incidence

The pooled incidence of *DDX41* mutation among 10975 screened patients with myeloid neoplasms from 9 case series was 3.3% ([95%CI 2.4-4.2%],  $I^2=79.7\%$ ,  $p<0.01$ ).
